# Supplementary material
Source: PubMed Central journal article supplement (PMC5727973)

# SUPPLEMENTARY MATERIAL

## TABLE OF CONTENTS

|                                     |                      |
|-------------------------------------|----------------------|
| <b>SUPPLEMENTARY FIGURES .....</b>  | <b>2</b>             |
| <i>SUPPLEMENTARY FIGURE 1</i> ..... | 2                    |
| <i>SUPPLEMENTARY FIGURE 2</i> ..... | 3                    |
| <i>SUPPLEMENTARY FIGURE 3</i> ..... | 4                    |
| <i>SUPPLEMENTARY FIGURE 4</i> ..... | 5                    |
| <b>SUPPLEMENTARY TABLE.....</b>     | <b>APPENDIX .XLS</b> |

- Annotation-1
- Sham Baseline
- Sham End
- Sham Post-Shock
- Shock Baseline
- Shock End
- Shock Post-Shock

Supplementary Figure 1 – Hierarchical clustering analysis of metabolic measurements in RBCs from sham or hemorrhagic shock rats

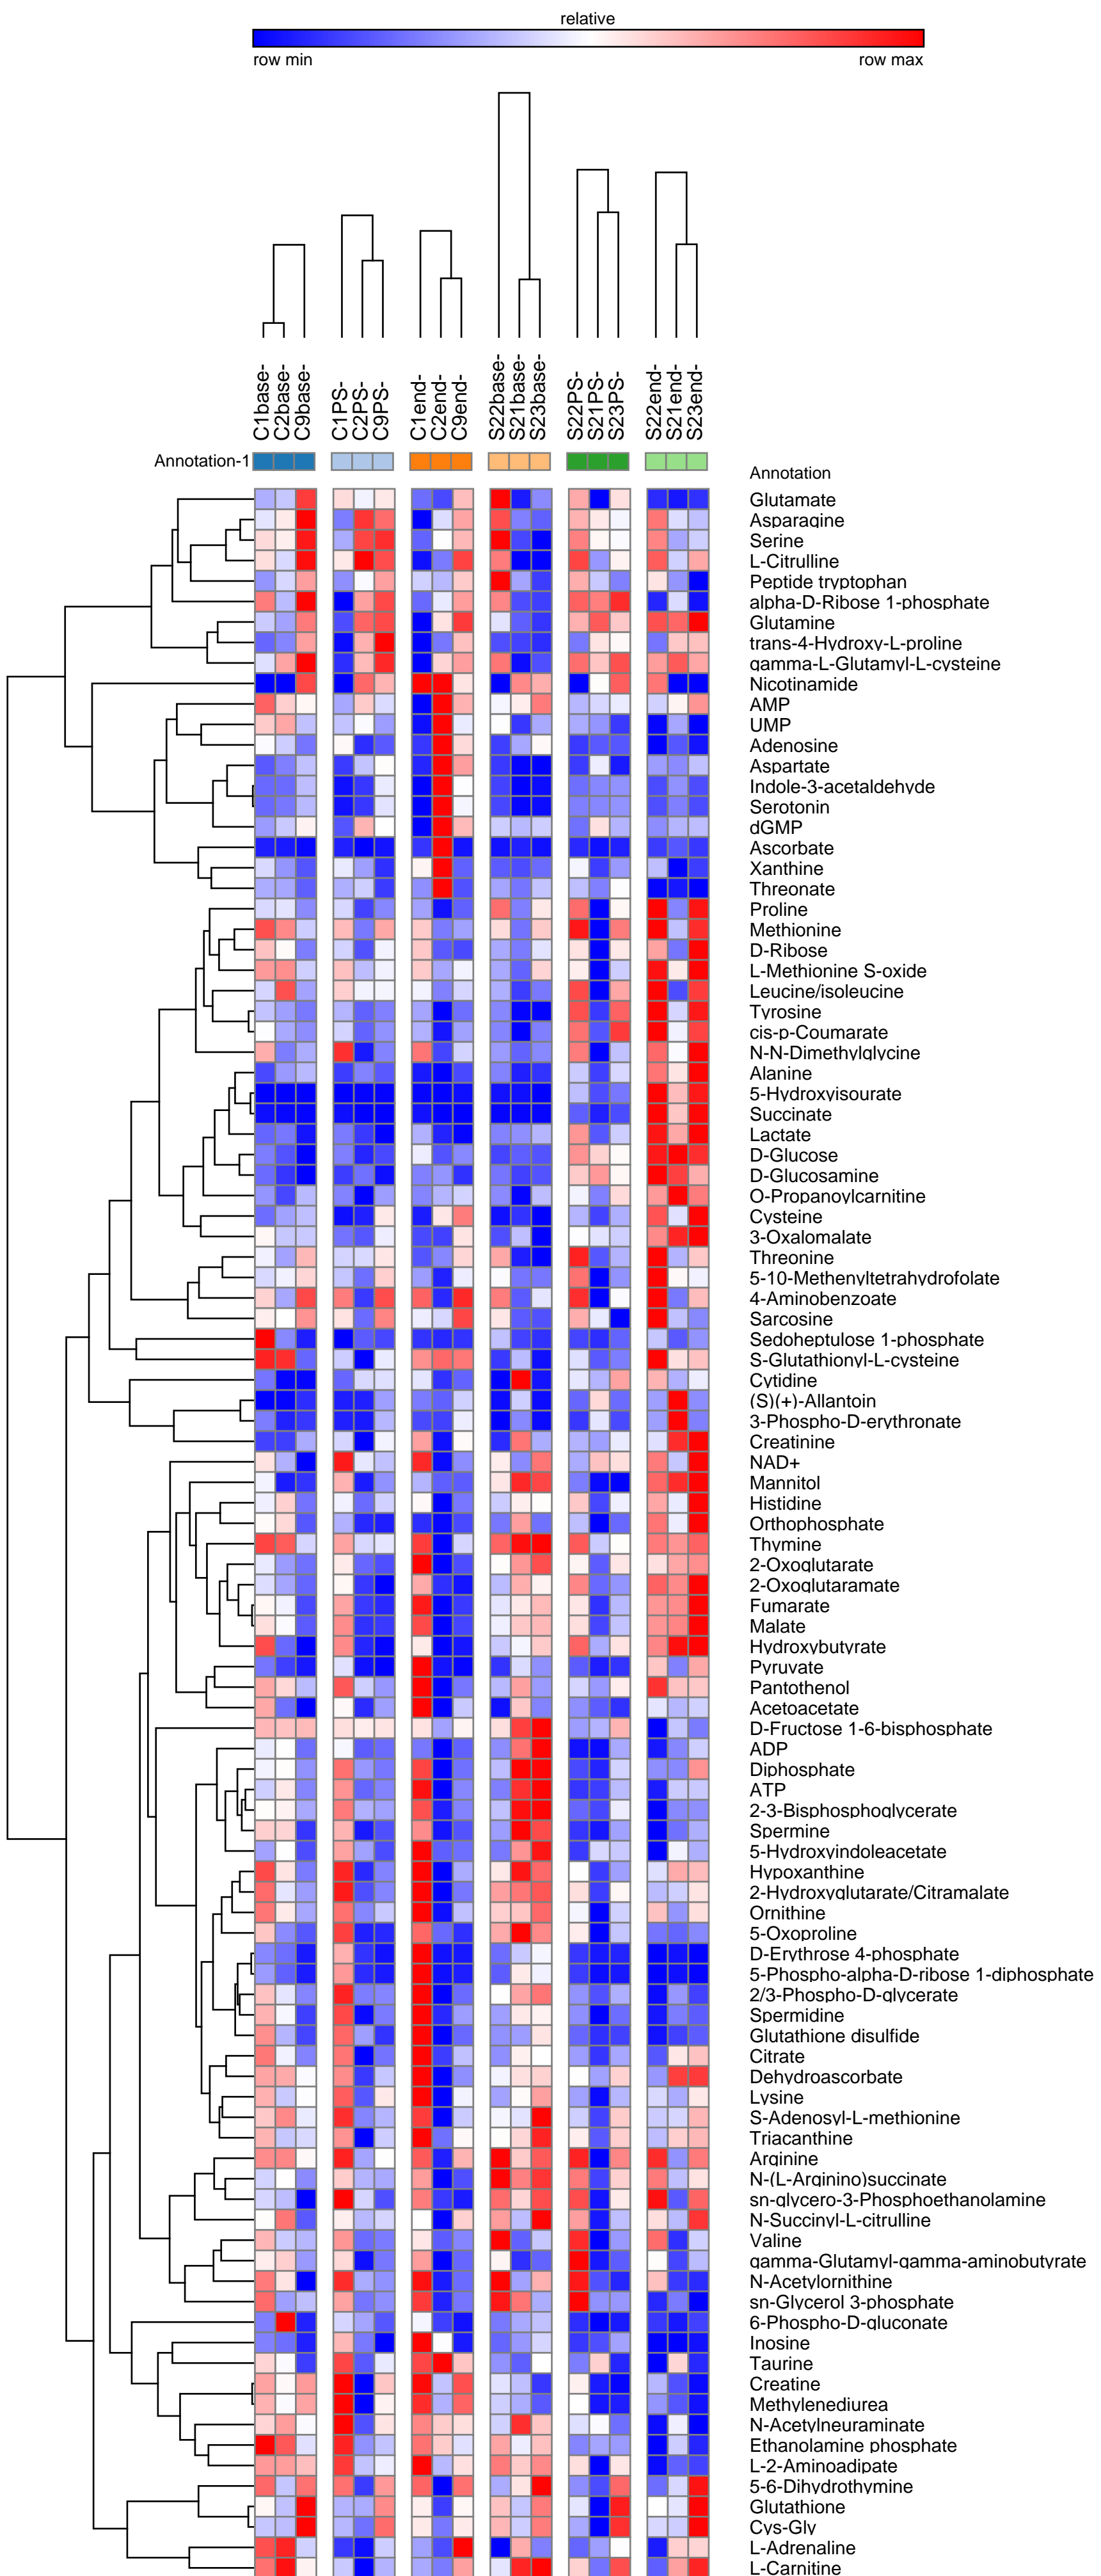

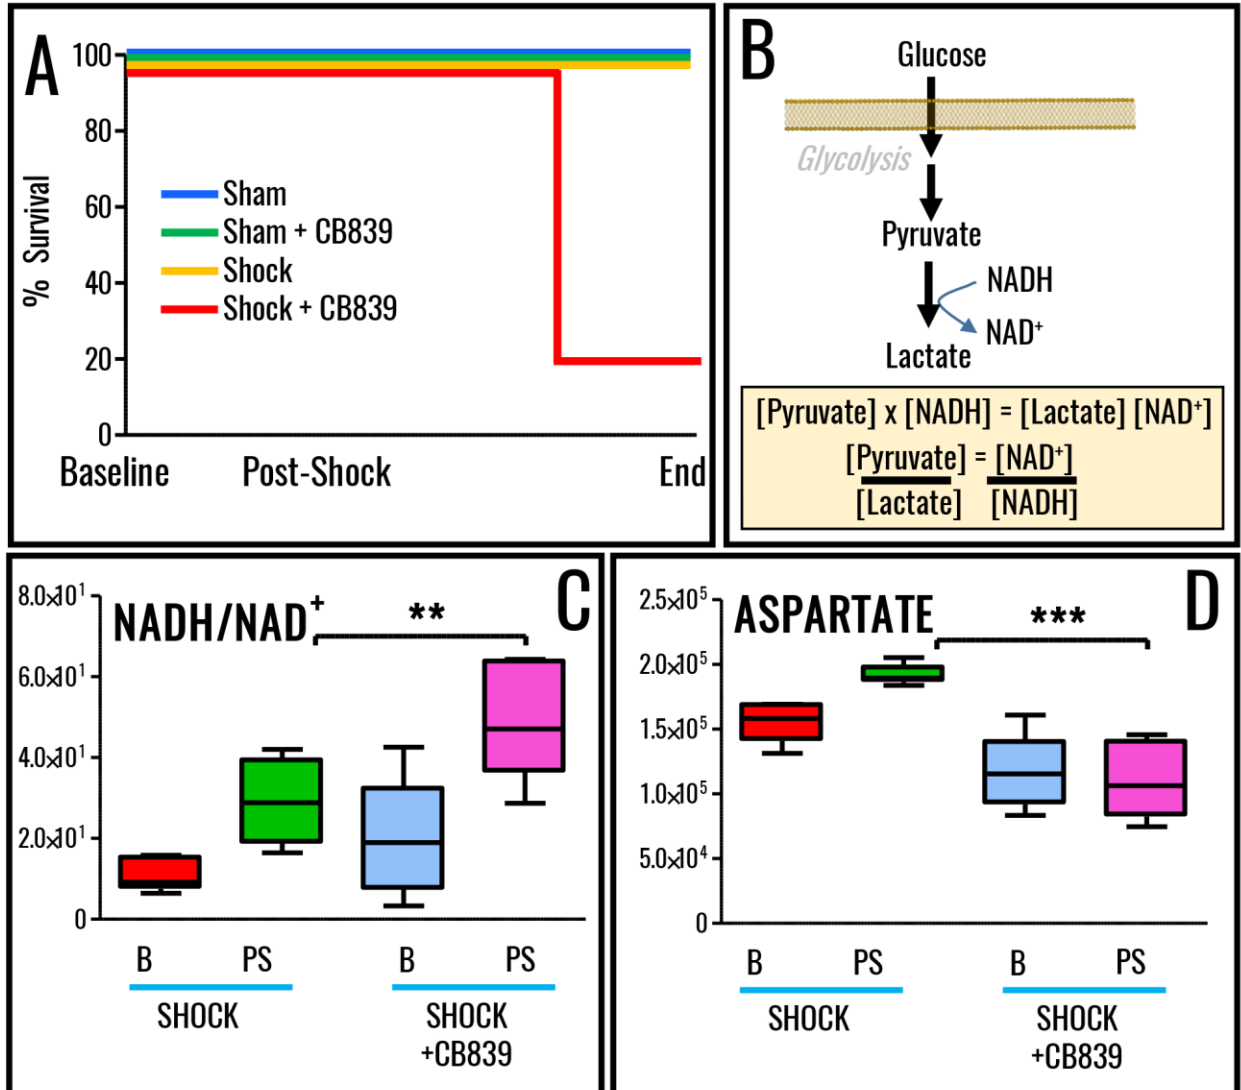

**Supplementary Figure 2 – Kaplan Meier curves indicate 80% mortality at 60 min from administration of the glutaminase inhibitor CB-839 in rats undergoing hemorrhagic shock (A). In these rats, RBC lactate/pyruvate ratios are proportional to NADH/NAD<sup>+</sup> ratios (according to the formula in B). NADH/NAD<sup>+</sup> ratios increase in response to the treatment with CB-839 in hemorrhagic shock rats, suggesting a central role for glutaminolysis in the preservation of reducing equivalent homeostasis in hemorrhagic shock erythrocytes. Inhibition of glutaminolysis in hemorrhagic shock rats increased aspartate consumption (D).**

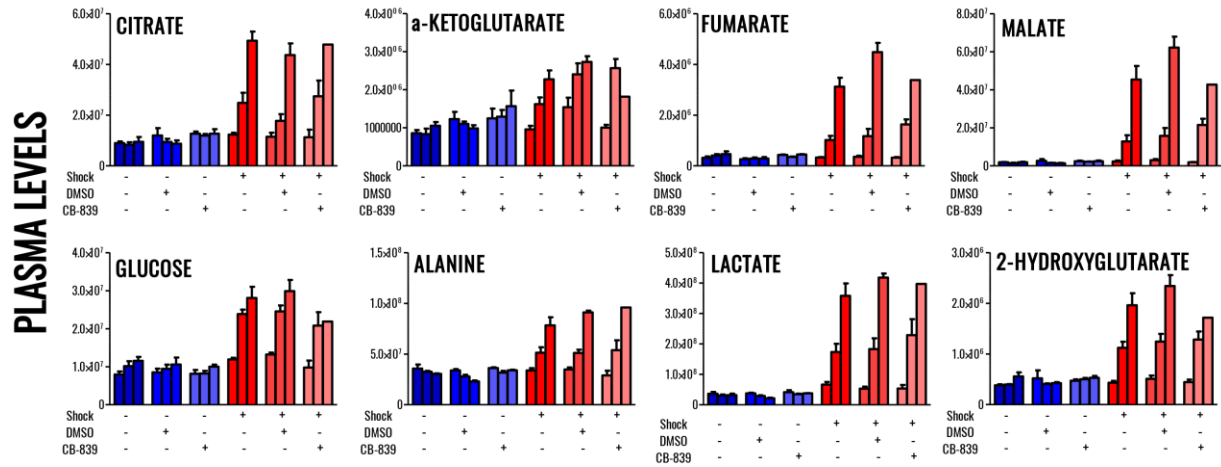

**Supplementary Figure 3 – Plasma levels of metabolites from the TCA cycle and glycolysis in sham rats or rats undergoing hemorrhagic shock in presence or absence of the glutaminase inhibitor CB-839.**

- Annotation-1
- Sham +CB839 Baseline
- Sham +CB839 End
- Sham +CB839 Post-Shock
- Sham Baseline
- Sham End
- Sham Post-Shock
- Shock +CB839 Baseline
- Shock +CB839 End
- Shock +CB839 Post-Shock
- Shock Baseline
- Shock End
- Shock Post-Shock

Supplementary Figure 4 – Hierarchical clustering analysis of metabolic measurements in RBCs from sham or hemorrhagic shock rats, in presence and absence of the treatment with the glutaminase inhibitor CB-839.

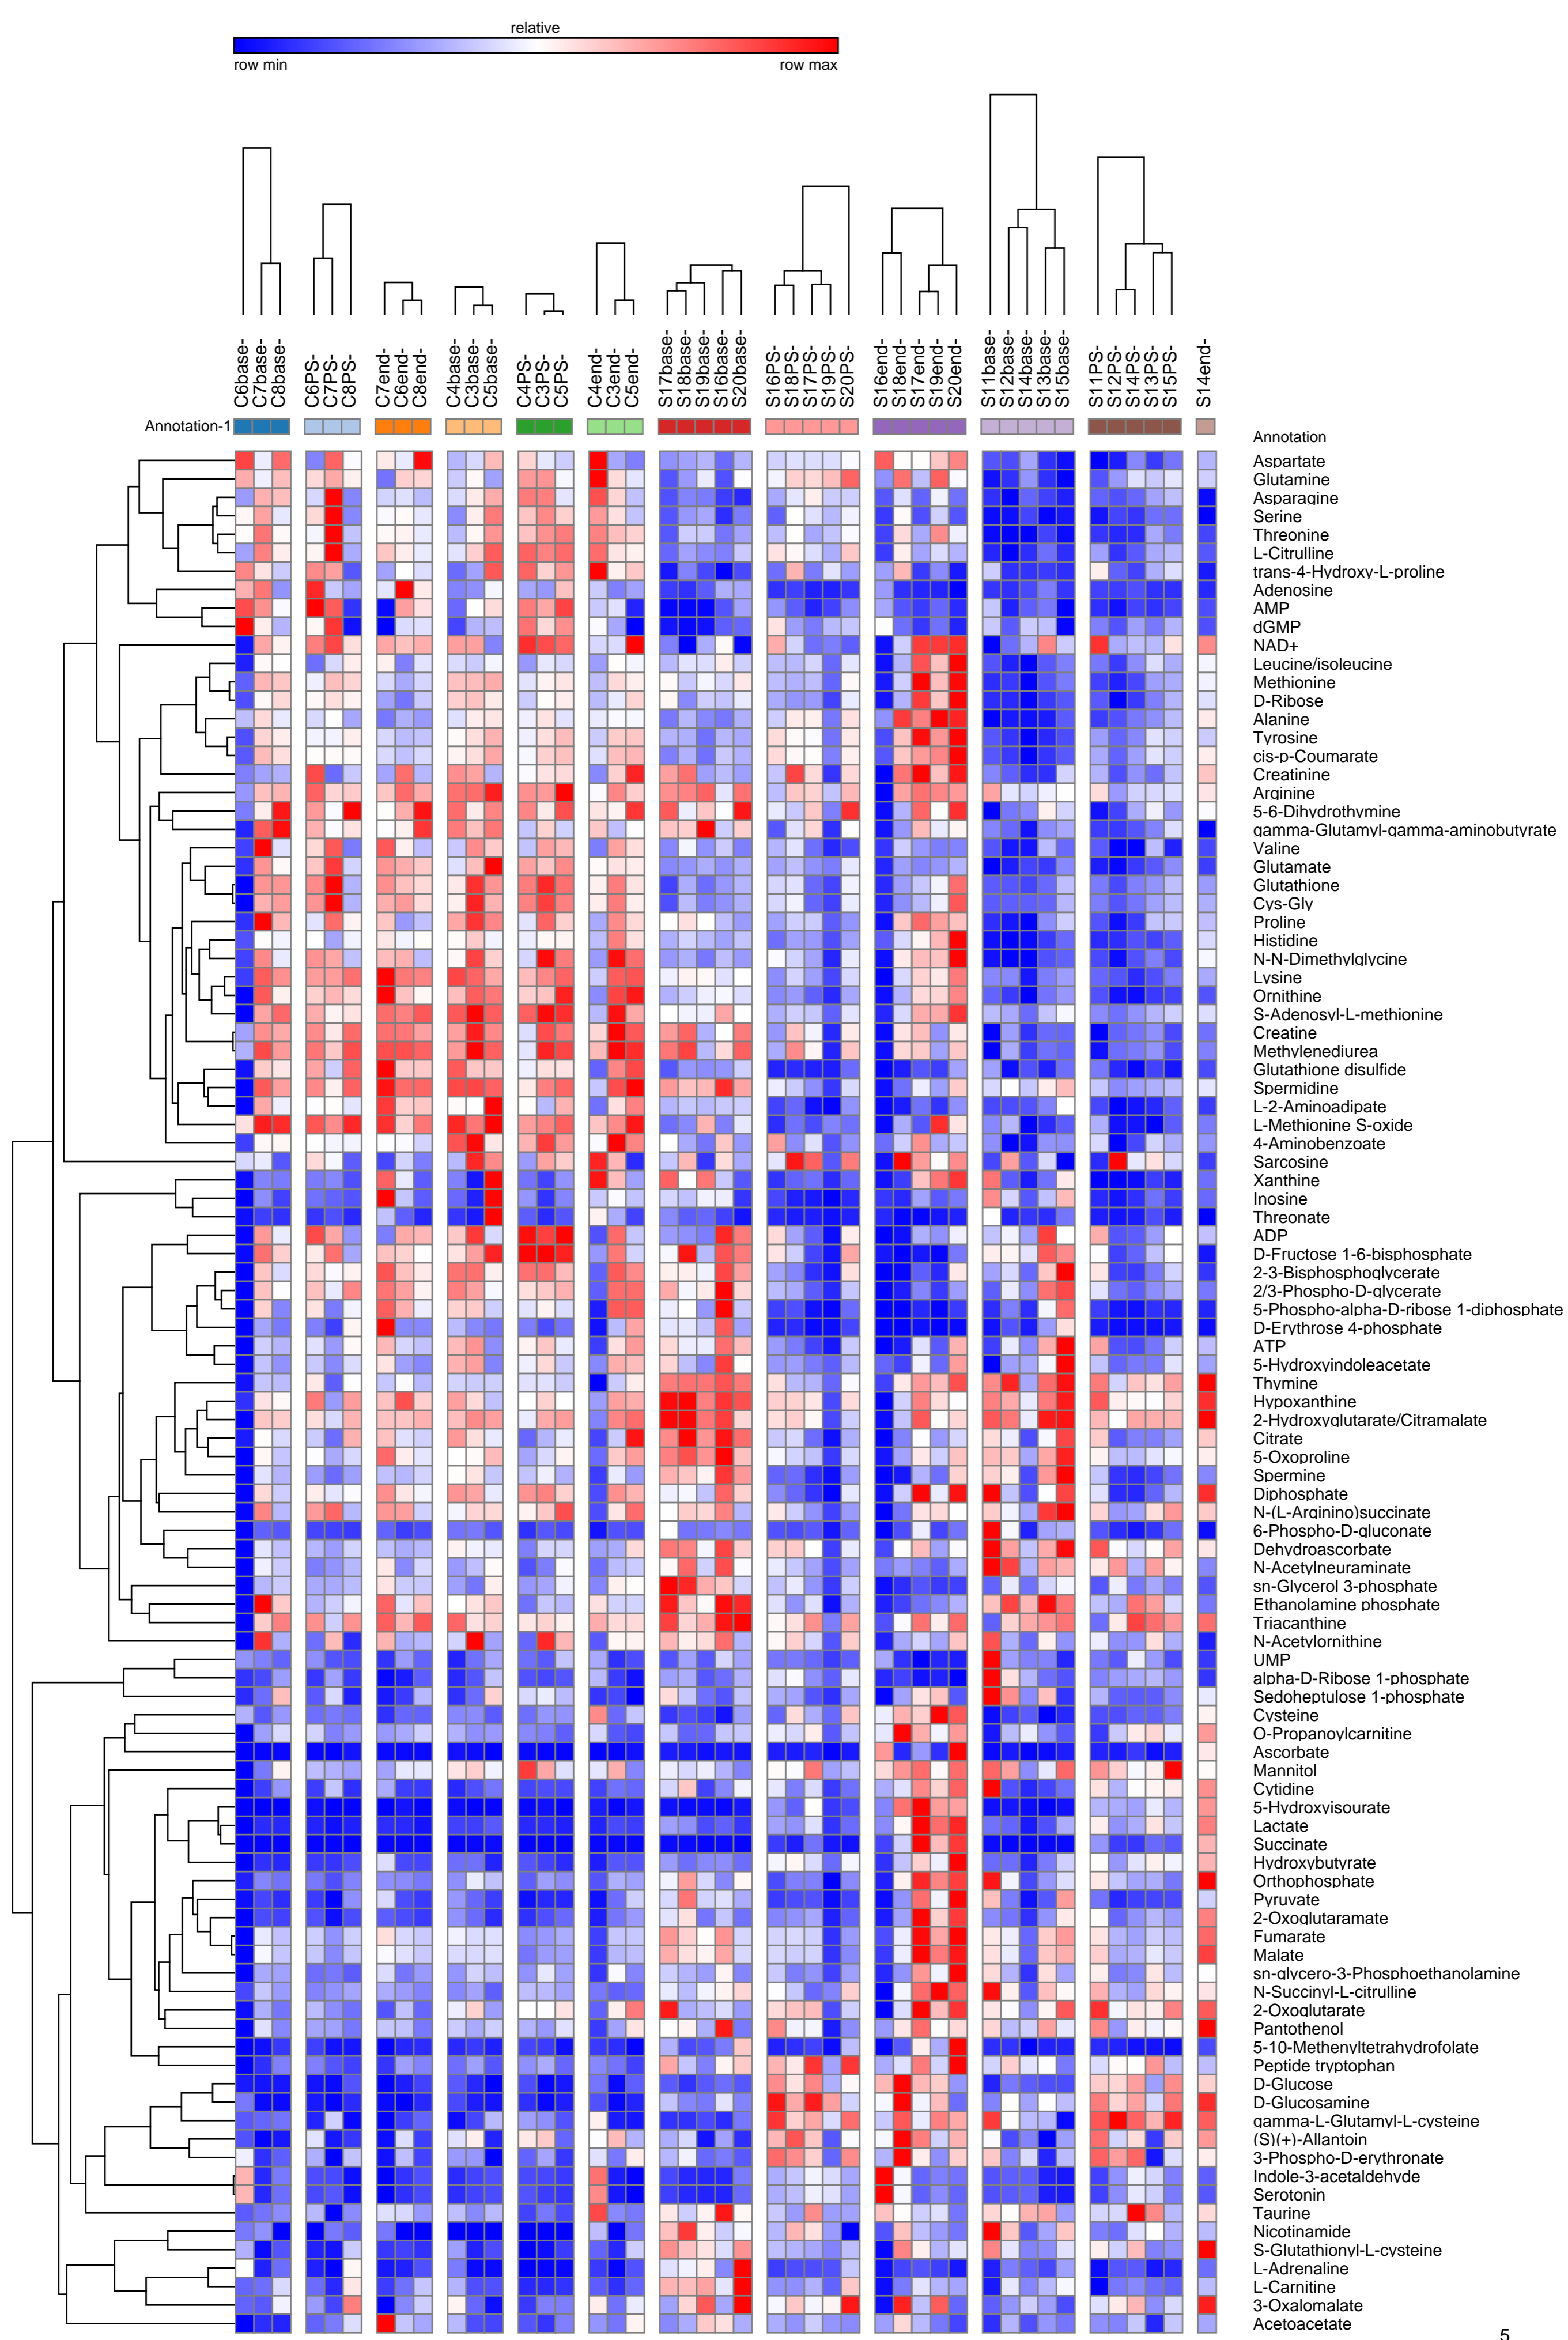

Supplement: ba007187-suppl1.pdf [file ba007187-suppl1.pdf]
